# Supplementary material for: Recyclable CFRPs with extremely high Tg: hydrothermal recyclability in pure water and upcycling of the recyclates for new composite preparation
Source: Royal Society of Chemistry journal article supplement (doi:10.1039/d2ta03161b), 2022-01-01
Supplement: d2ta03161b1.pdf [file d2ta03161b1.pdf]

## Supporting information

### Recyclable CFRP with Extremely High $T_g$ : Hydrothermal Recyclability in Pure Water and Upcycling of the Recyclates in New Composite Preparation

**Table S1.** Summary of the recyclable CFRP based on dynamic covalent bonds.

| Starting materials                                 | Types of reversible bonds | $T_g$ [°C]  | Recycling conditions                              | Ref. |
|----------------------------------------------------|---------------------------|-------------|---------------------------------------------------|------|
| DGEBA, glutaric anhydride, ethylenediamine         | Hydroxyl-ester            | 65.9        | Water, 180 °C, 5 h                                | 1    |
| Epoxidized menthane diamine, adipic acid           | Hydroxyl-ester            | 72.1 ~ 86.4 | Ethanolamine, 60 °C, 30 min                       | 2    |
| Epoxidized soybean oil, camphoric acid             | Hydroxyl-ester            | 40 ~ 48     | Ethylene glycol, 190 °C, 20 h                     | 3    |
| DGEBA, hexahydro-4-methylphthalic anhydride        | Hydroxyl-ester            | 157         | 0.30 M TBD-EG/NMP (10/90) solution, 170 °C, 1.5 h | 4    |
| Tung oil-based triglycidyl ester, menthane diamine | Hydroxyl-ester            | 60.5 ~ 82.6 | Ethylene glycol, 90 °C, 1 h                       | 5    |

|                                                                                   |                   |          |                                                              |    |
|-----------------------------------------------------------------------------------|-------------------|----------|--------------------------------------------------------------|----|
| Vanillin, 4-aminophenol, glycerol triglycidyl ether                               | Imine bonds       | 70       | 0.1 M ethylenediamine solution (in DMF), 50 °C, 2 h          | 6  |
| Terephthaldehyde, tris (2-aminoethyl) amine, diethylenetriamine, ethylene diamine | Imine bonds       | 18 ~ 135 | Diethylenetriamine, RT, 24 h                                 | 7  |
| Vanillin, 4,4'-methylenebiscyclohexanamine                                        | Imine bonds       | 172      | 0.1 M HCl in methanol /H <sub>2</sub> O (8/2, v/v), RT, 15 h | 8  |
| DGEBA, 4-aminophenyl disulfide                                                    | Disulfide bonds   | 130      | 2-mercaptoethanol in DMF, RT, 24 h                           | 9  |
| DGEBA, bis(4-hydroxyphenyl) disulfide, 4-aminophenyl disulfide                    | Disulfide bonds   | 147      | Dithiothreitol/DMF (0.1 mg/ml) solution, 90 °C, 1 h          | 10 |
| Novolac resin, phenylboronic acid                                                 | Dynamic B-O bonds | 135      | Ethanol, acetone/water or ethanol/water mixtures, RT, 14 h   | 11 |
| Cresol novolac resin, 4-vinlyoxybutyl glycidyl ether                              | Acetal linkages   | 110      | 0.1 M HCl in a THF/water (9/1, v/v), RT, 24 h                | 12 |
| Vanillin, erythritol, DDS                                                         | Acetal linkages   | 184      | 0.1 M HCl in DMSO/H <sub>2</sub> O (9/1, v/v), 50 °C, 6 h    | 13 |



**Table S2.** Summary of  $T_g$  and mechanical properties of different cured samples

| Sample      | $T_g$<br>[°C] | Tensile strength<br>[MPa] | Tensile modulus<br>[GPa] | Elongation at break<br>[%] | Impact strength<br>[kJ m <sup>-2</sup> ] |
|-------------|---------------|---------------------------|--------------------------|----------------------------|------------------------------------------|
| TN-0.05TEOA | 224.1         | 65.9 ± 5.3                | 1.70 ± 0.08              | 4.0 ± 0.4                  | 9.2 ± 2.3                                |
| TN-0.1TEOA  | 203.5         | 75.0 ± 4.1                | 1.76 ± 0.08              | 6.0 ± 0.2                  | 9.1 ± 1.1                                |
| TN-0.15TEOA | 196.0         | -                         | -                        | -                          | -                                        |
| TN-2E4MI    | 276.9         | 79.4 ± 4.0                | 1.87 ± 0.10              | 2.6 ± 0.1                  | 10.3 ± 2.0                               |
| DN-2E4MI    | 178.2         | 59.0 ± 4.6                | 1.32 ± 0.07              | 3.0 ± 0.3                  | 7.2 ± 0.8                                |

**Table S3.** Tensile properties of prepared CFRP with three layers of carbon fibric mat

| CFRP          | Polymer matrix | Type of carbon fiber | Tensile strength<br>[MPa] |
|---------------|----------------|----------------------|---------------------------|
| TN-0.1TEOA-CF | TN-0.1TEOA     | Virgin CF            | 502 ± 25                  |
| TN-2E4MI-CF   | TN-2E4MI       | Virgin CF            | 558 ± 67                  |
| DN-2E4MI-CF   | DN-2E4MI       | Virgin CF            | 421 ± 28                  |
| DN-10rEP-CF   | DN-10rEP       | Virgin CF            | 384 ± 30                  |
| DN-20rEP-CF   | DN-20rEP       | Virgin CF            | 374 ± 13                  |
| DN-30rEP-CF   | DN-30rEP       | Virgin CF            | 383 ± 35                  |
| TN-0.1TEOA-CF | TN-0.1TEOA     | Recycled CF          | 437 ± 37                  |
| DN-2E4MI-CF   | DN-2E4MI       | Recycled CF          | 394 ± 67                  |
| DN-20rEP-CF   | DN-20rEP       | Recycled CF          | 300 ± 27                  |

**Table S4.** Formulations of new epoxy curing systems with rEP

| Samples  | DER 331         |             | rEP             |             | NMA                 |             | 2E4MI       |
|----------|-----------------|-------------|-----------------|-------------|---------------------|-------------|-------------|
|          | Epoxy<br>[mmol] | Mass<br>[g] | Epoxy<br>[mmol] | Mass<br>[g] | Anhydride<br>[mmol] | Mass<br>[g] | Mass<br>[g] |
| DN-2E4MI | 5.3             | 1           | 0               | 0           | 5.3                 | 0.94        | 0.06        |
| DN-10rEP | 4.8             | 0.9         | 0.2             | 0.1         | 5.0                 | 0.89        | 0.06        |
| DN-20rEP | 4.2             | 0.8         | 0.4             | 0.2         | 4.6                 | 0.81        | 0.05        |
| DN-30rEP | 3.7             | 0.7         | 0.6             | 0.3         | 4.3                 | 0.77        | 0.05        |

**Table S5.** Summary of  $T_g$  and mechanical properties of cured epoxies resin with rEP

| Sample   | $T_g$ | Tensile strength | Elongation at break | Impact strength       |
|----------|-------|------------------|---------------------|-----------------------|
|          | [°C]  | [MPa]            | [%]                 | [kJ m <sup>-2</sup> ] |
| DN-2E4MI | 178.2 | 59.0 ± 4.6       | 3.0 ± 0.3           | 7.2 ± 0.8             |
| DN-10rEP | 160.0 | 47.6 ± 9.7       | 3.5 ± 0.7           | 14.6 ± 3.0            |
| DN-20rEP | 150.1 | 32.8 ± 5.3       | 2.2 ± 0.8           | 11.0 ± 2.2            |
| DN-30rEP | 137.3 | 30.3 ± 6.5       | 2.1 ± 0.4           | 5.9 ± 1.3             |

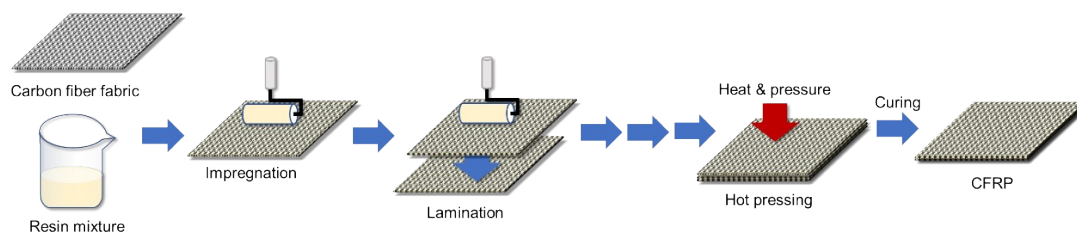

**Scheme S1.** Schematic illustration for the preparation of CFRP.

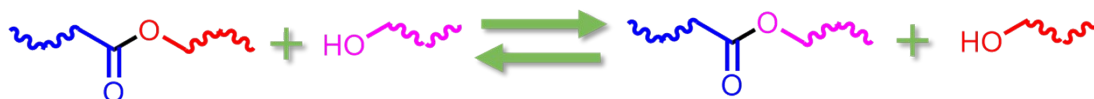

**Scheme S2.** Schematic illustration of dynamic transesterification reaction (DTR).

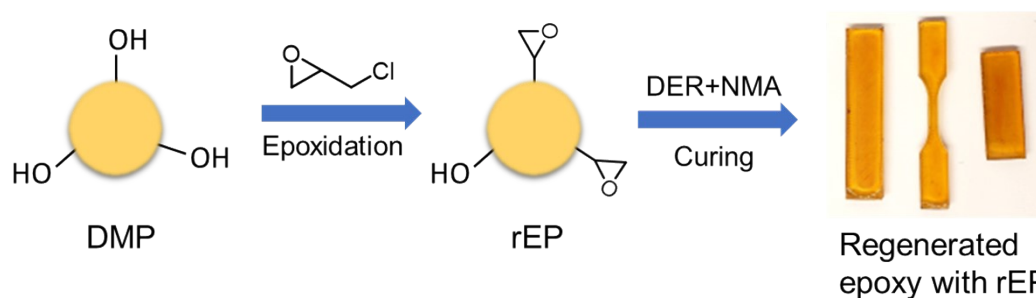

**Scheme S3.** Schematic illustration of chemical medication of DMP and preparation of new epoxy with rEP.

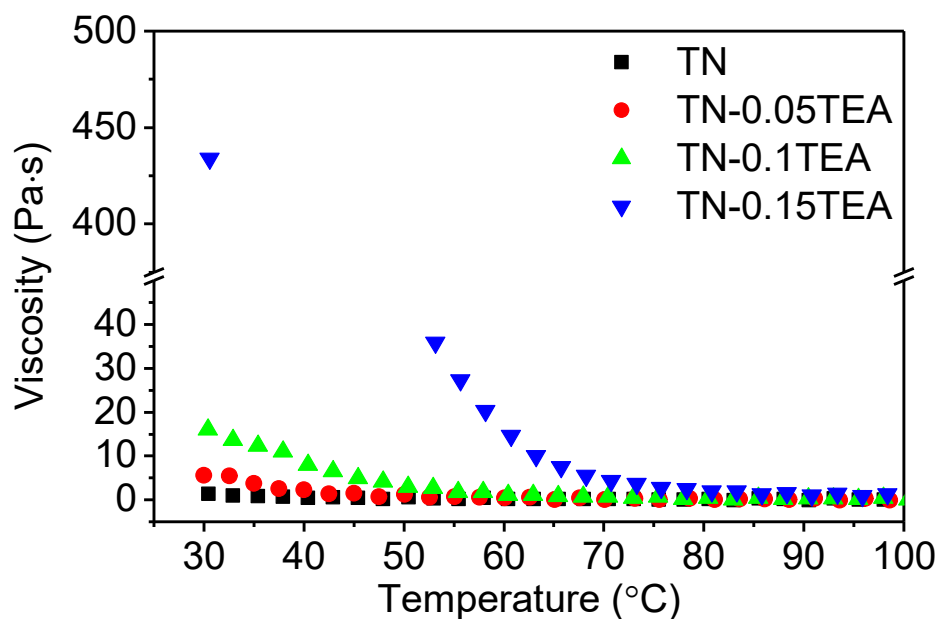

**Figure S1.** Viscosity of epoxy mixtures as the function of temperature.

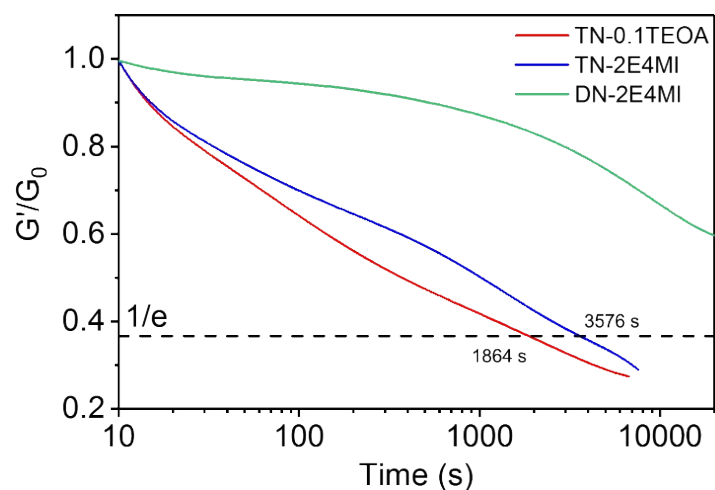

**Figure S2.** Stress relaxation behavior of TN-0.1TEOA, TN-2E4MI and DN-2E4MI at 200 °C.

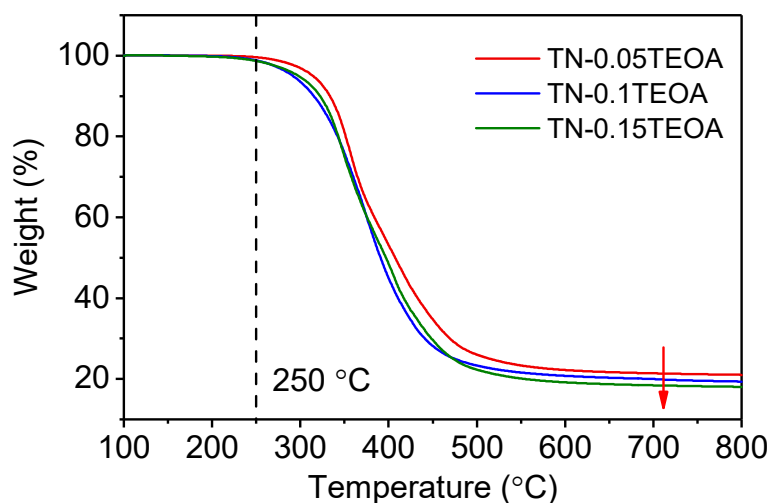

**Figure S3.** TGA curves of the cured TN-TEOA samples. TGA was performed under nitrogen atmosphere with a heating rate of 10 K min<sup>-1</sup>.

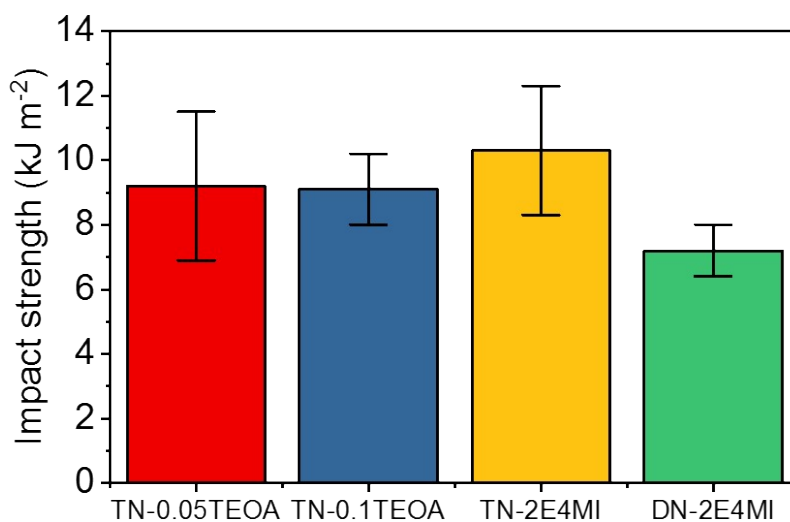

**Figure S4.** Impact strengths of TN-TEOAs, TN-2E4MI and DN-2E4MI.

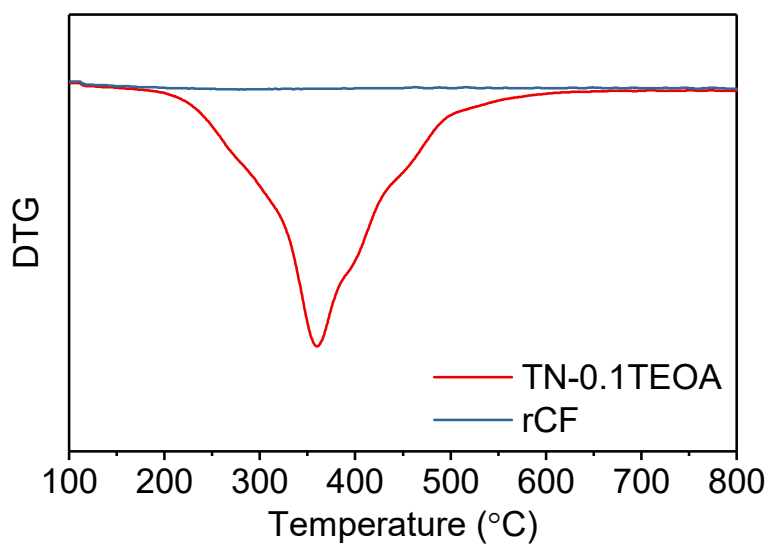

**Figure S5.** Thermogravimetric derivative (DTG) curves of the TN-0.1TEOA composite and rCF.

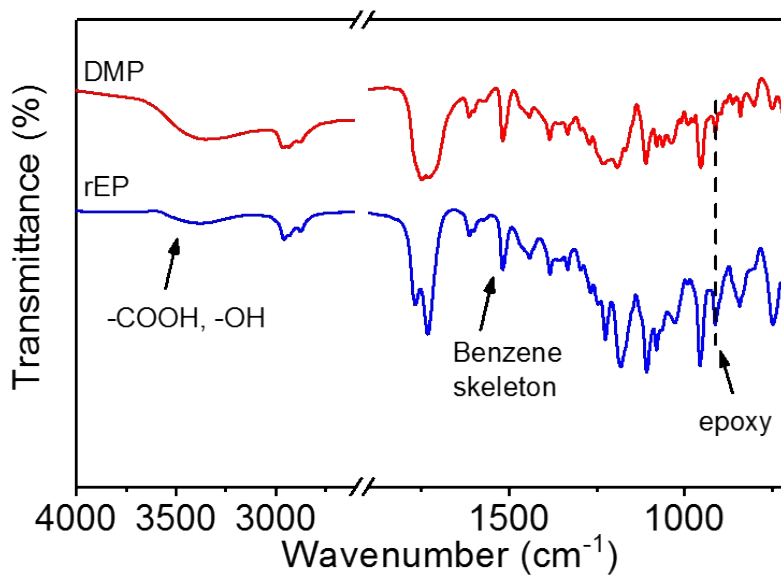

**Figure S6.** FTIR spectra of DMP and rEP.



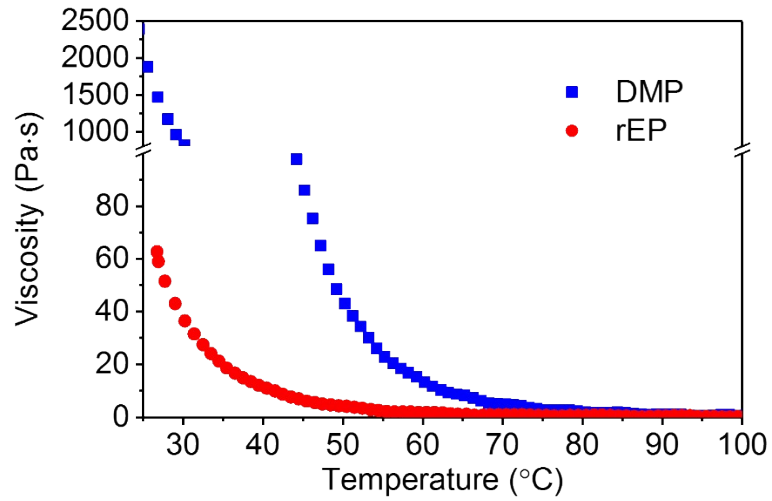

**Figure S7.** Apparent viscosity of DMP and rEP that was determined by rheometer.

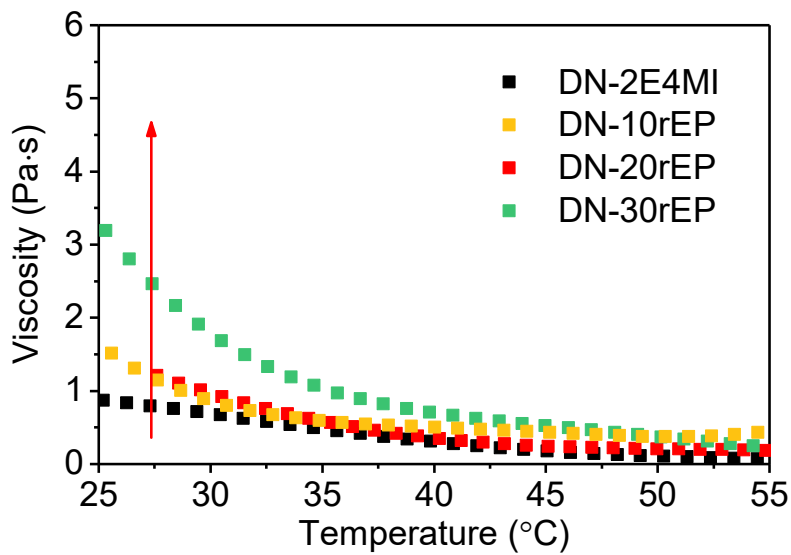

**Figure S8.** Apparent viscosity of epoxy resin mixture with rEP.

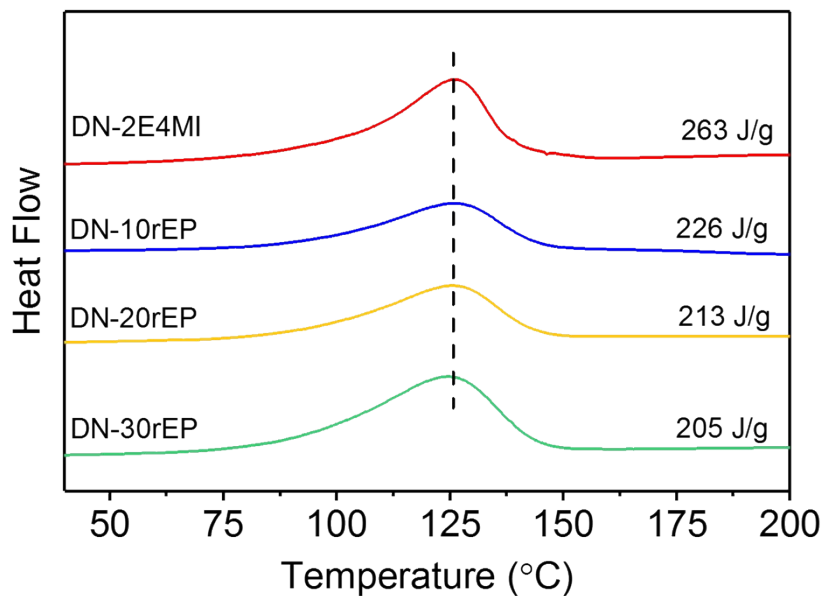

**Figure S9.** Exothermal curves of epoxy resin mixture with rEP as replacement for DER epoxy resin.

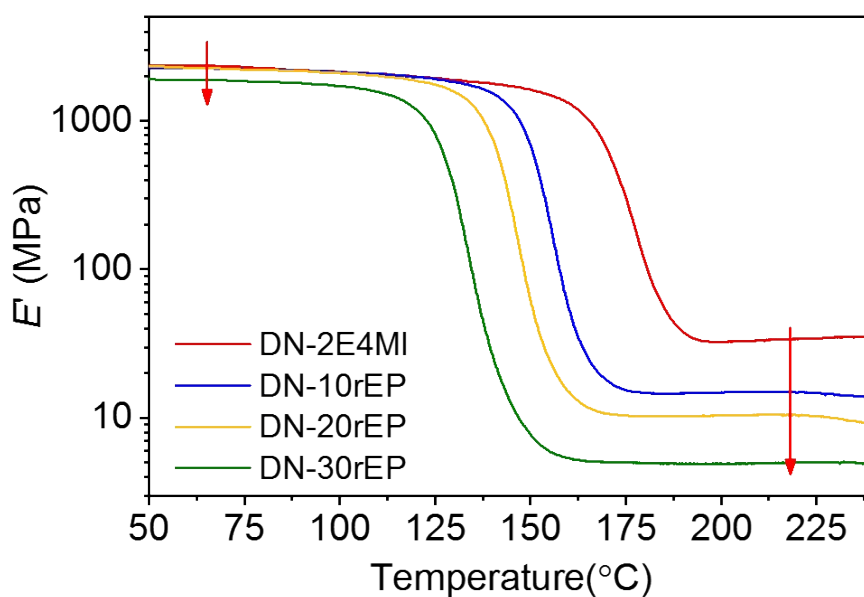

**Figure S10.** Storage modulus ( $E'$ ) of cured epoxies that use rEP to replace part of DER resin

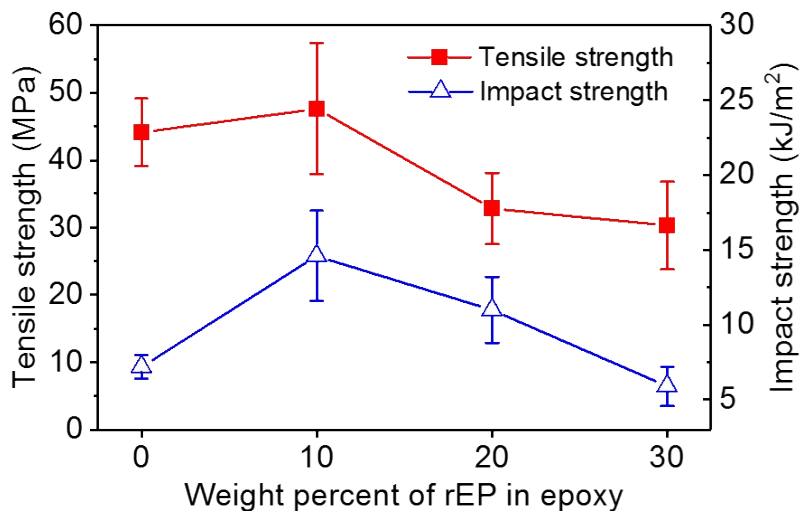

**Figure S11.** Tensile and impact strength of cured epoxies with different contents of rEP.

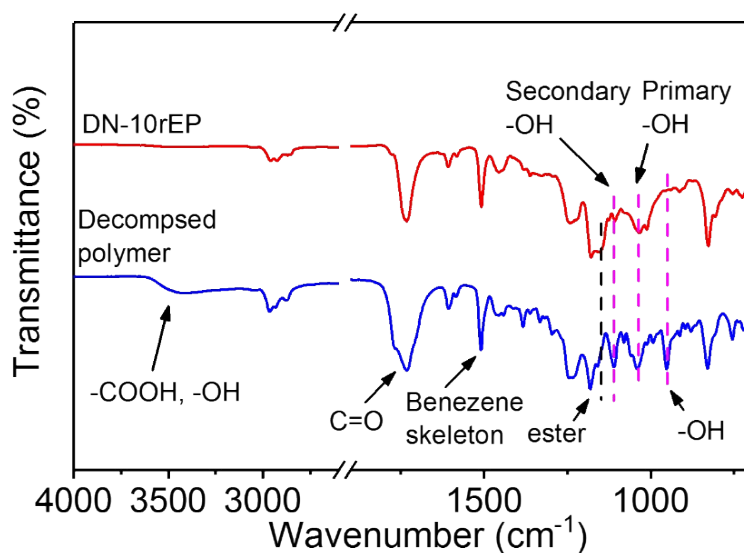

**Figure S12.** FTIR spectra of DN-20rEP before and after the degradation in pure water at 200 °C for 5 hours.

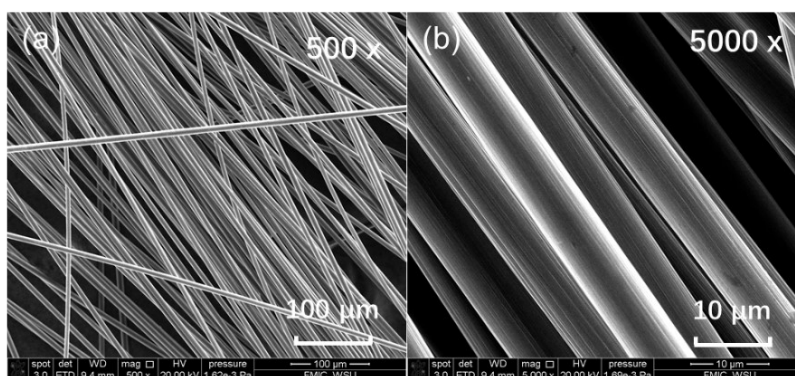

**Figure S13.** SEM images of recycled carbon fiber collected from DN-10rEP-rCF after the degradation in pure water at 200 °C for 5 hours.

## Reference

1. T. Liu, C. Hao, L. Shao, W. Kuang, L. Cosimbescu, K. L. Simmons and J. Zhang, *Macromol. Rapid Commun.*, 2021, **42**, e2000458.
2. Y. Xu, S. Dai, L. Bi, J. Jiang, H. Zhang and Y. Chen, *Chem. Eng. J.*, 2022, **429**, 132518.
3. W. Zhang, J. Wu, L. Gao, B. Zhang, J. Jiang and J. Hu, *Green Chem.*, 2021, **23**, 2763-2772.
4. X. Kuang, Y. Zhou, Q. Shi, T. Wang and H. J. Qi, *ACS Sustain. Chem. Eng.*, 2018, **6**, 9189-9197.
5. Y. Xu, S. Dai, H. Zhang, L. Bi, J. Jiang and Y. Chen, *ACS Sustain. Chem. Eng.*, 2021, **9**, 16281-16290.
6. Y. Liu, G. Liu, Y. Li, Y. Weng and J. Zeng, *ACS Sustain. Chem. Eng.*, 2021, **9**, 4638-4647.
7. P. Taynton, H. Ni, C. Zhu, K. Yu, S. Loob, Y. Jin, H. J. Qi and W. Zhang, *Adv. Mater.*, 2016, **28**, 2904-2909.
8. S. Wang, S. Q. Ma, Q. Li, X. W. Xu, B. B. Wang, W. C. Yuan, S. H. Zhou, S. S. You and J. Zhu, *Green Chem.*, 2019, **21**, 1484-1497.
9. A. R. de Luzuriaga, R. Martin, N. Markaide, A. Rekondo, G. Cabañero, J. Rodríguez and I. Odriozola, *Mater. Horiz.*, 2016, **3**, 241-247.
10. H. Si, L. Zhou, Y. Wu, L. Song, M. Kang, X. Zhao and M. Chen, *Compos. Part B Eng.*, 2020, **199**, 108278.
11. S. Wang, X. Xing, X. Zhang, X. Wang and X. Jing, *J. Mater. Chem. A*, 2018, **6**, 10868-10878.
12. T. Hashimoto, H. Meiji, M. Urushisaki, T. Sakaguchi, K. Kawabe, C. Tsuchida and K. Kondo, *J. Polym. Sci. Part A Polym. Chem.*, 2012, **50**, 3674-3681.

13. W. C. Yuan, S. Q. Ma, S. Wang, Q. Li, B. B. Wang, X. W. Xu, K. F. Huang, J. Chen, S.

S. You and J. Zhu, *Eur. Polym. J.*, 2019, **117**, 200-207.
